# Supplementary material for: Salience memories formed by value, novelty and aversiveness jointly shape object responses in the prefrontal cortex and basal ganglia
Source: PubMed Central journal article supplement (PMC9596424; doi:10.1038/s41467-022-33514-3), 2022-10-25
Supplement: 41467_2022_33514_MOESM1_ESM.pdf [file 41467_2022_33514_MOESM1_ESM.pdf]

# Supplemental Information

## **Salience Memories Formed by Value, Novelty and Aversiveness Jointly Shape Object Responses in the Prefrontal Cortex and Basal Ganglia**

Ali Ghazizadeh<sup>1\*</sup> and Okihide Hikosaka<sup>2,3</sup>

<sup>1</sup>Bio-intelligence Research Unit, Electrical Engineering Department, Sharif University of Technology, Tehran 11365-11155, Iran

<sup>2</sup>Laboratory of Sensorimotor Research, National Eye Institute, NIH, Bethesda, MD 20892, USA

<sup>3</sup>National Institute on Drug Abuse, NIH, Baltimore, MD 21224, USA

\* Corresponding author: [alieghazizadeh@gmail.com](mailto:alieghazizadeh@gmail.com)

Supplementary Figure 1

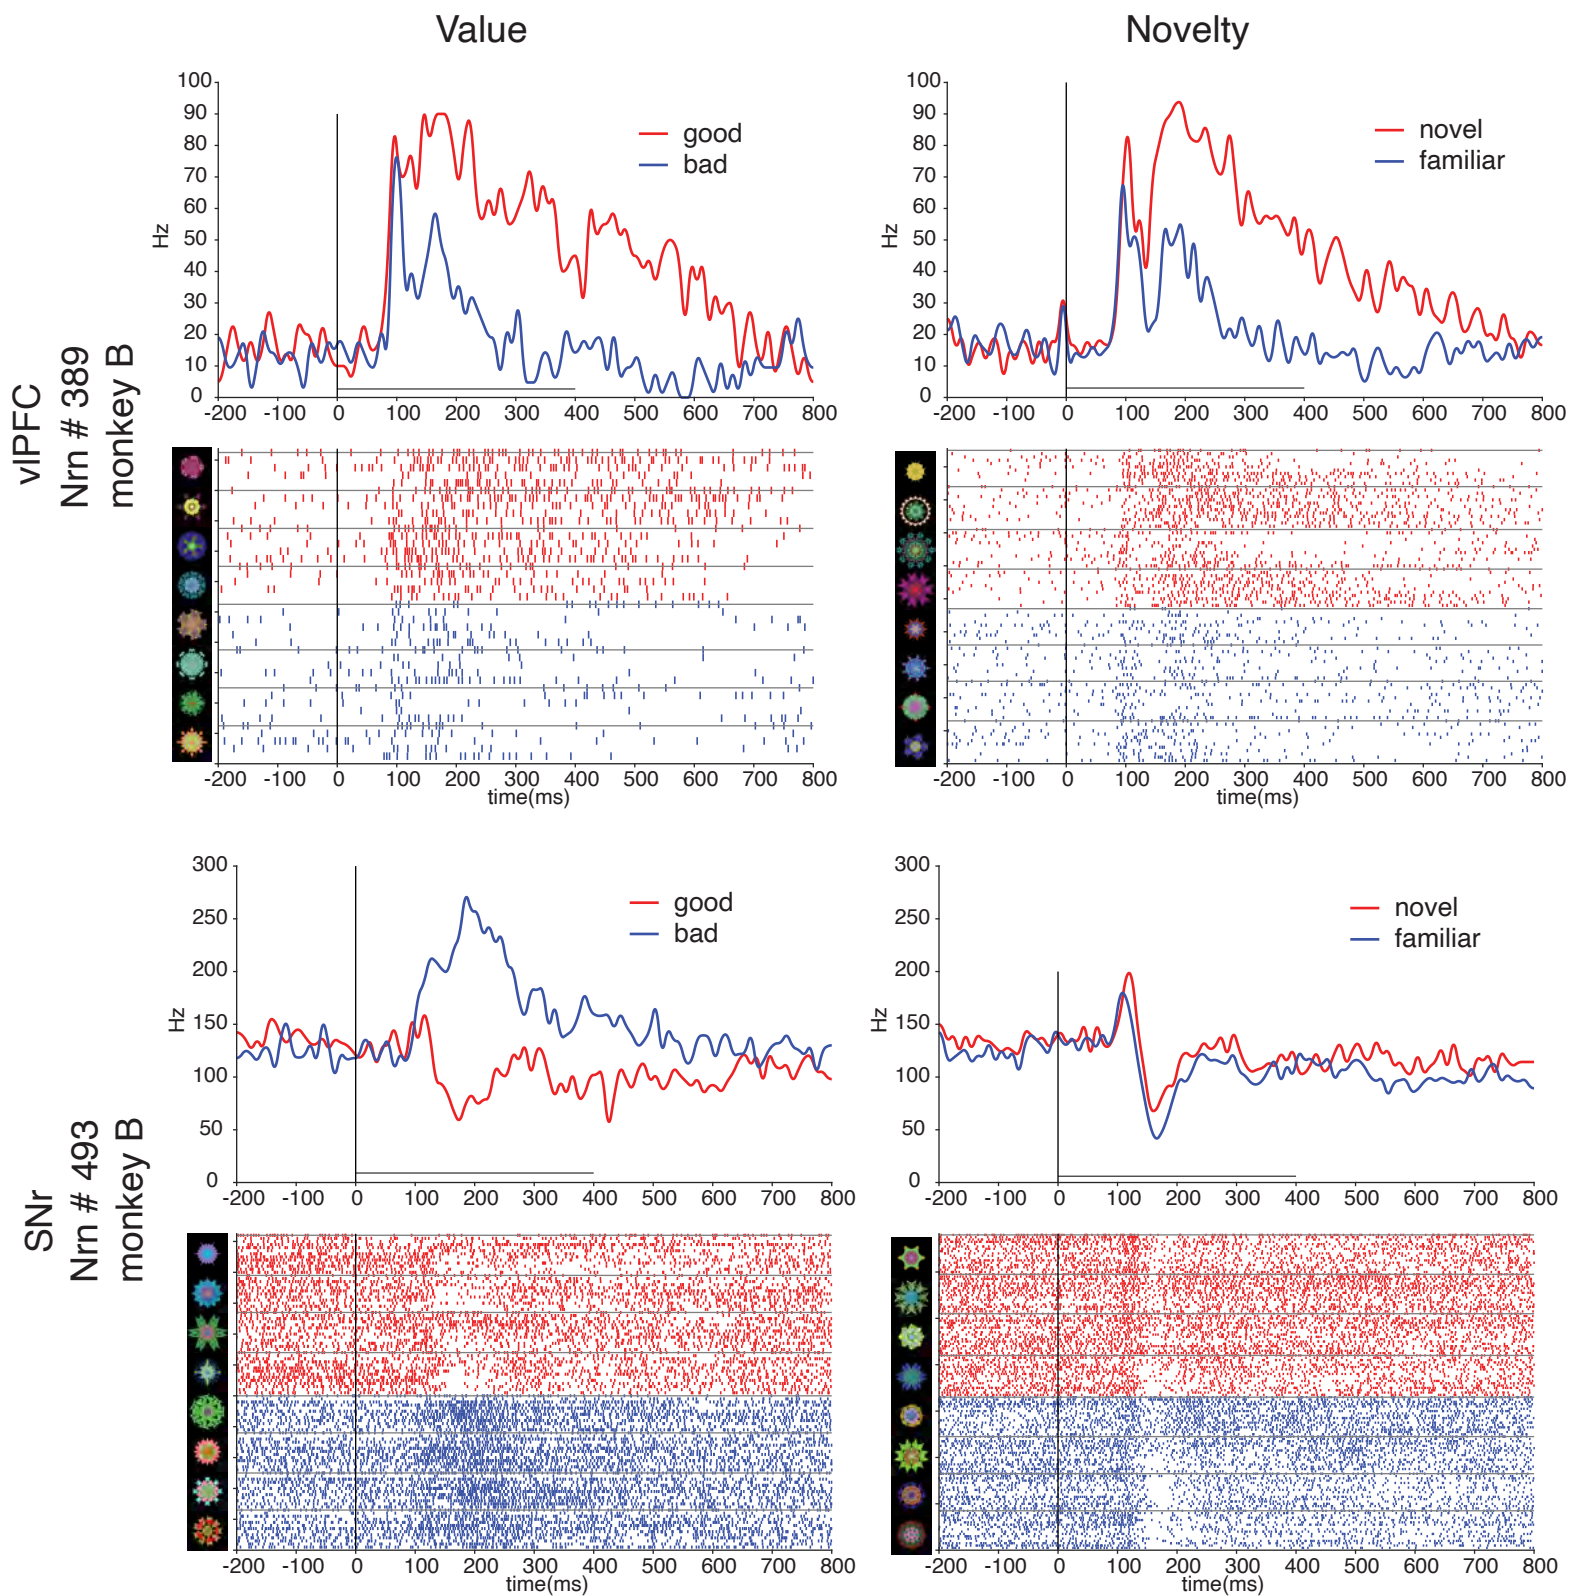

**Supplementary Figure 1. Example passive viewing responses to objects in value and novelty domains in vIPFC and cdISNr.**

Example neurons recorded with both a good/bad set and a novel/familiar set in vIPFC (top row) and in cdISNr (bottom row). In each row the top part shows average peristimulus time histograms (PSTH) of firing to two object categories and the bottom part shows raster plot of firing sorted for each fractal object. Actual fractals used are shown to the left and grouped into good/bad and novel/familiar. Horizontal line in the PSTH indicates object on duration (400ms)

Supplementary Figure 2

**a**

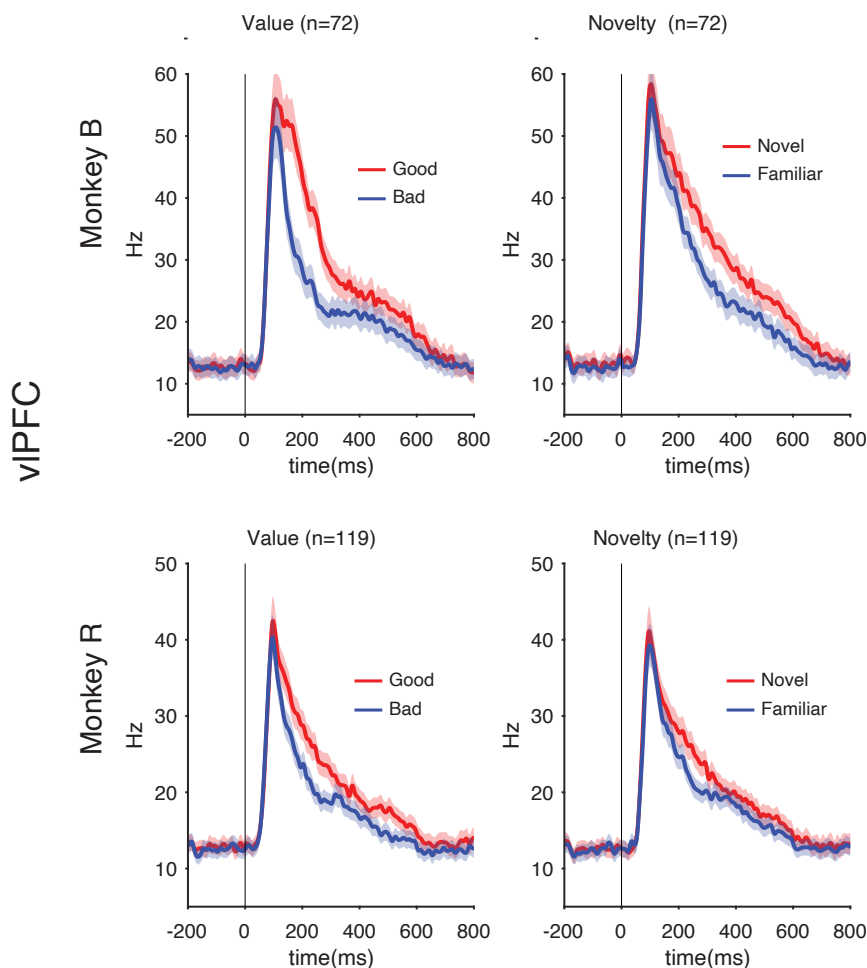

**b**

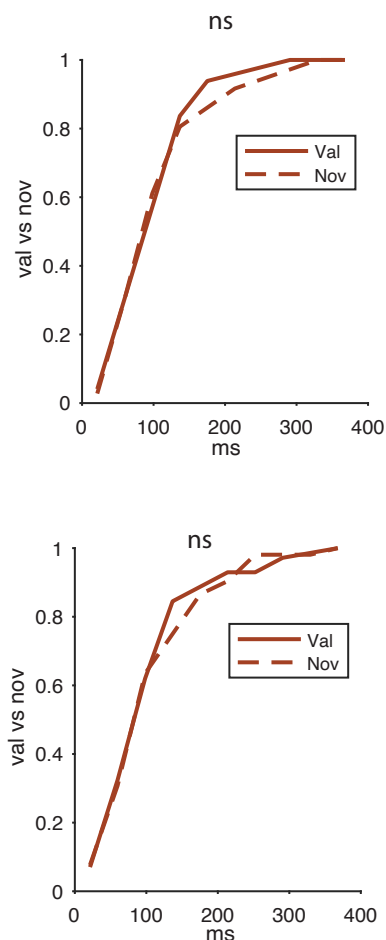

**c**

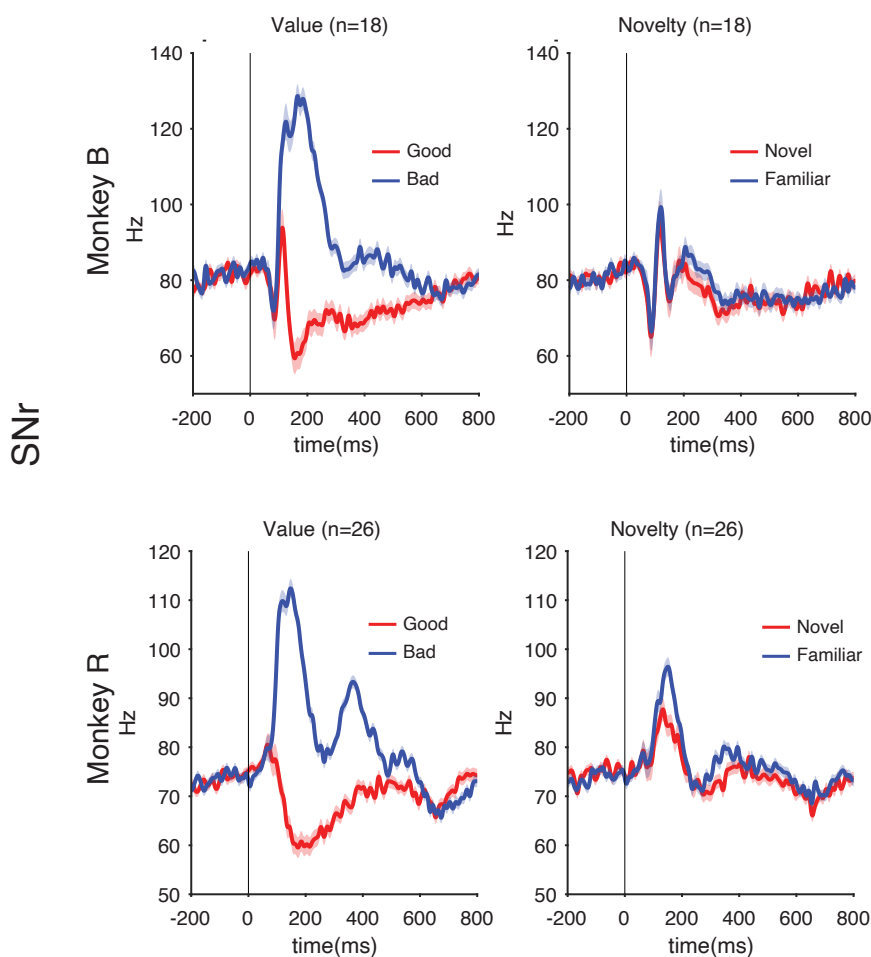

**d**

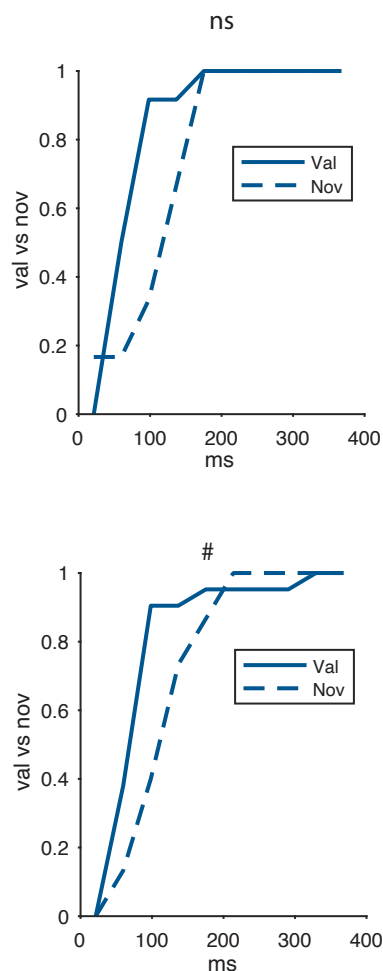

**Supplementary Figure 2. Responses of vIPFC and cdISNr neurons and their latencies to good/bad and novel/familiar objects separately for each monkey.**

a) Population average peristimulus time histogram (PSTH) to good vs bad objects and to novel vs familiar objects in vIPFC in each monkey. Color-patch indicates s.e.m. here and throughout. b) Cumulative distribution of value signal and novelty signal onsets across neurons in vIPFC for each monkey (monkey B:  $t_{83}=-0.5$ ,  $p=0.5$ , monkey R:  $t_{121}=-0.2$ ,  $p=0.7$ ). c) Same as A but for SNr in each monkey. D) Same as B but for cdISNr in each monkey (monkey B:  $t_{16}=-1$ ,  $p=0.3$ , monkey R:  $t_{34}=-1.9$ ,  $p=0.06$ ). Note, despite large number of recorded SNr neurons, since novelty coding exists in a small subset of them, the degree of freedom for comparison of value and novelty onset in SNr is low and thus despite clear trend of novelty coding being later than value coding in SNr in both monkeys, it does not reach significance in individual monkeys. The combined data is however significant as shown in Fig 1F.

**a**

Substantia Nigra Compacta(SNc)

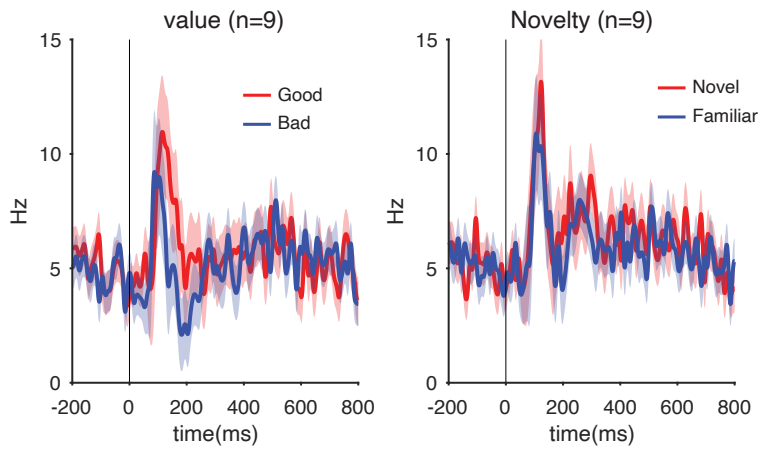

**b**

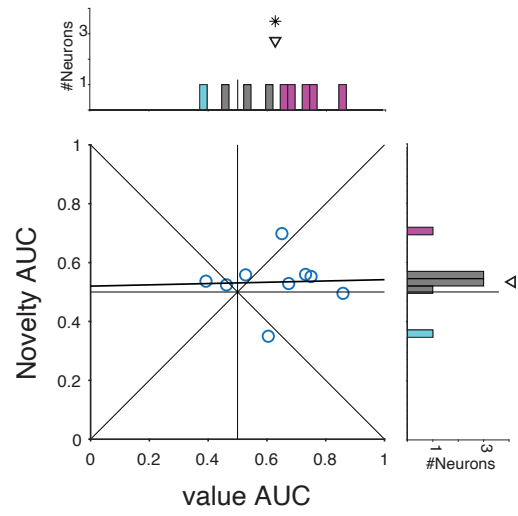

**Supplementary Figure 3. Responses of putative dopamine neurons to good/bad and novel/familiar objects.** a) Same format as Figure 1C. b) Same format as Figure 1G. Source data are provided as a Source Data file.

## Supplementary Figure 4

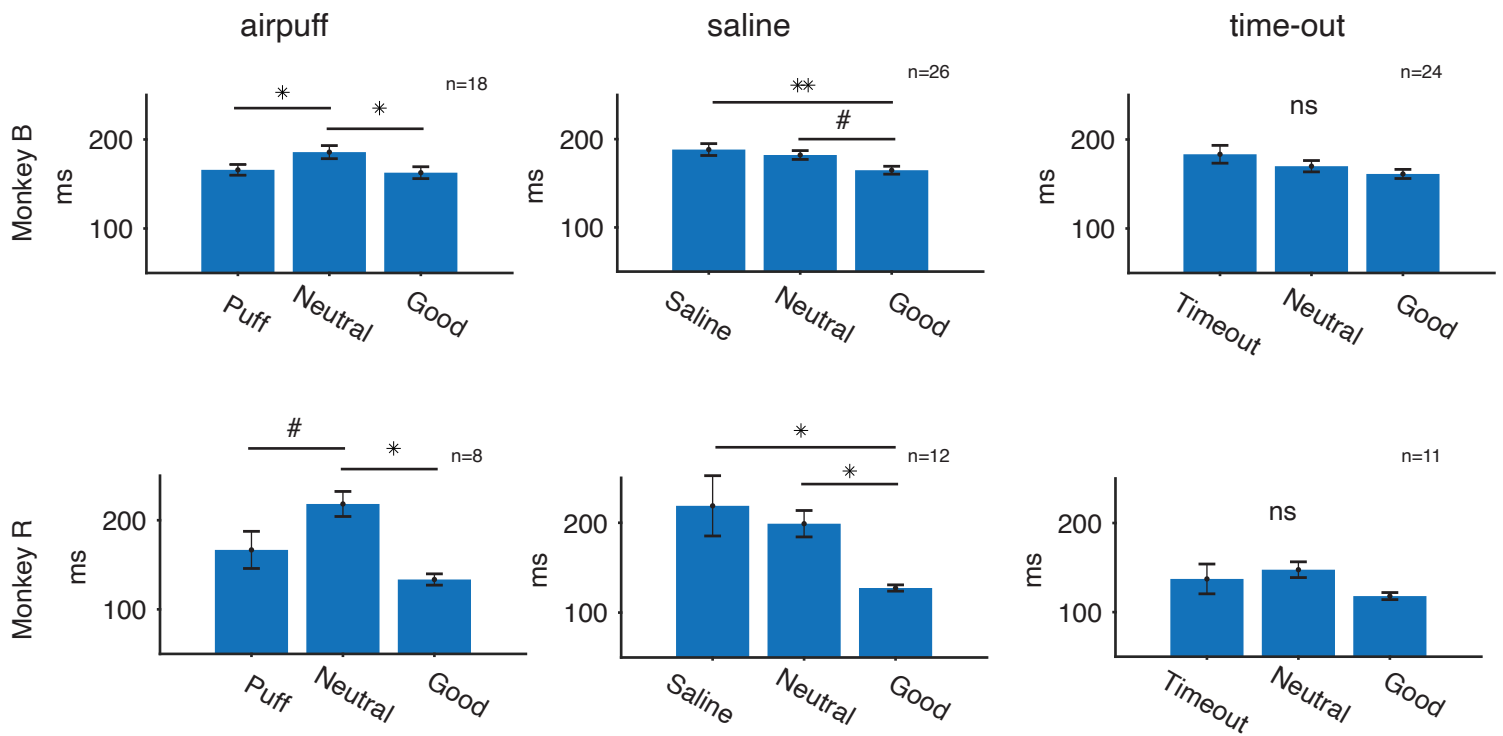

### Supplementary Figure 4. Saccade reaction time to aversive, neutral and good objects during Pavlovian task

Reaction time (RT) to look at aversive, neutral and good objects after their appearance in the periphery during force trials in Pavlovian task in monkey B for airpuff set ( $F_{2,51}=3.49$ ,  $p=3e-2$ ), salience set ( $F_{2,75}=4.89$ ,  $p=1e-2$ ) and time-out set ( $F_{2,68}=2.18$ ,  $p=0.12$ ) and in monkey R for for airpuff set ( $F_{2,21}=6.88$ ,  $p=2e-3$ ), salience set ( $F_{2,30}=6.88$ ,  $p=3e-3$ ) and time-out set ( $F_{2,30}=1.8$ ,  $p=0.18$ ). In both monkeys RT to airpuff object was faster than neutral objects consistent with its positive salience. RT to saline and time-out objects were not different from neutral object consistent with their lack of salience. For time-out objects differences were not significant but had a similar trend to saline objects. Note that in the Pavlovian task monkey's action (to look or not to look at fractals) had no consequence for outcome delivery. post-hoc hsd comparisons are marked. Data are presented as mean values +/- SEM. \*\* $p<0.01$ , \*  $p<0.05$ , # $p<0.08$ . Source data are provided as a Source Data file.

## Supplementary Figure 5

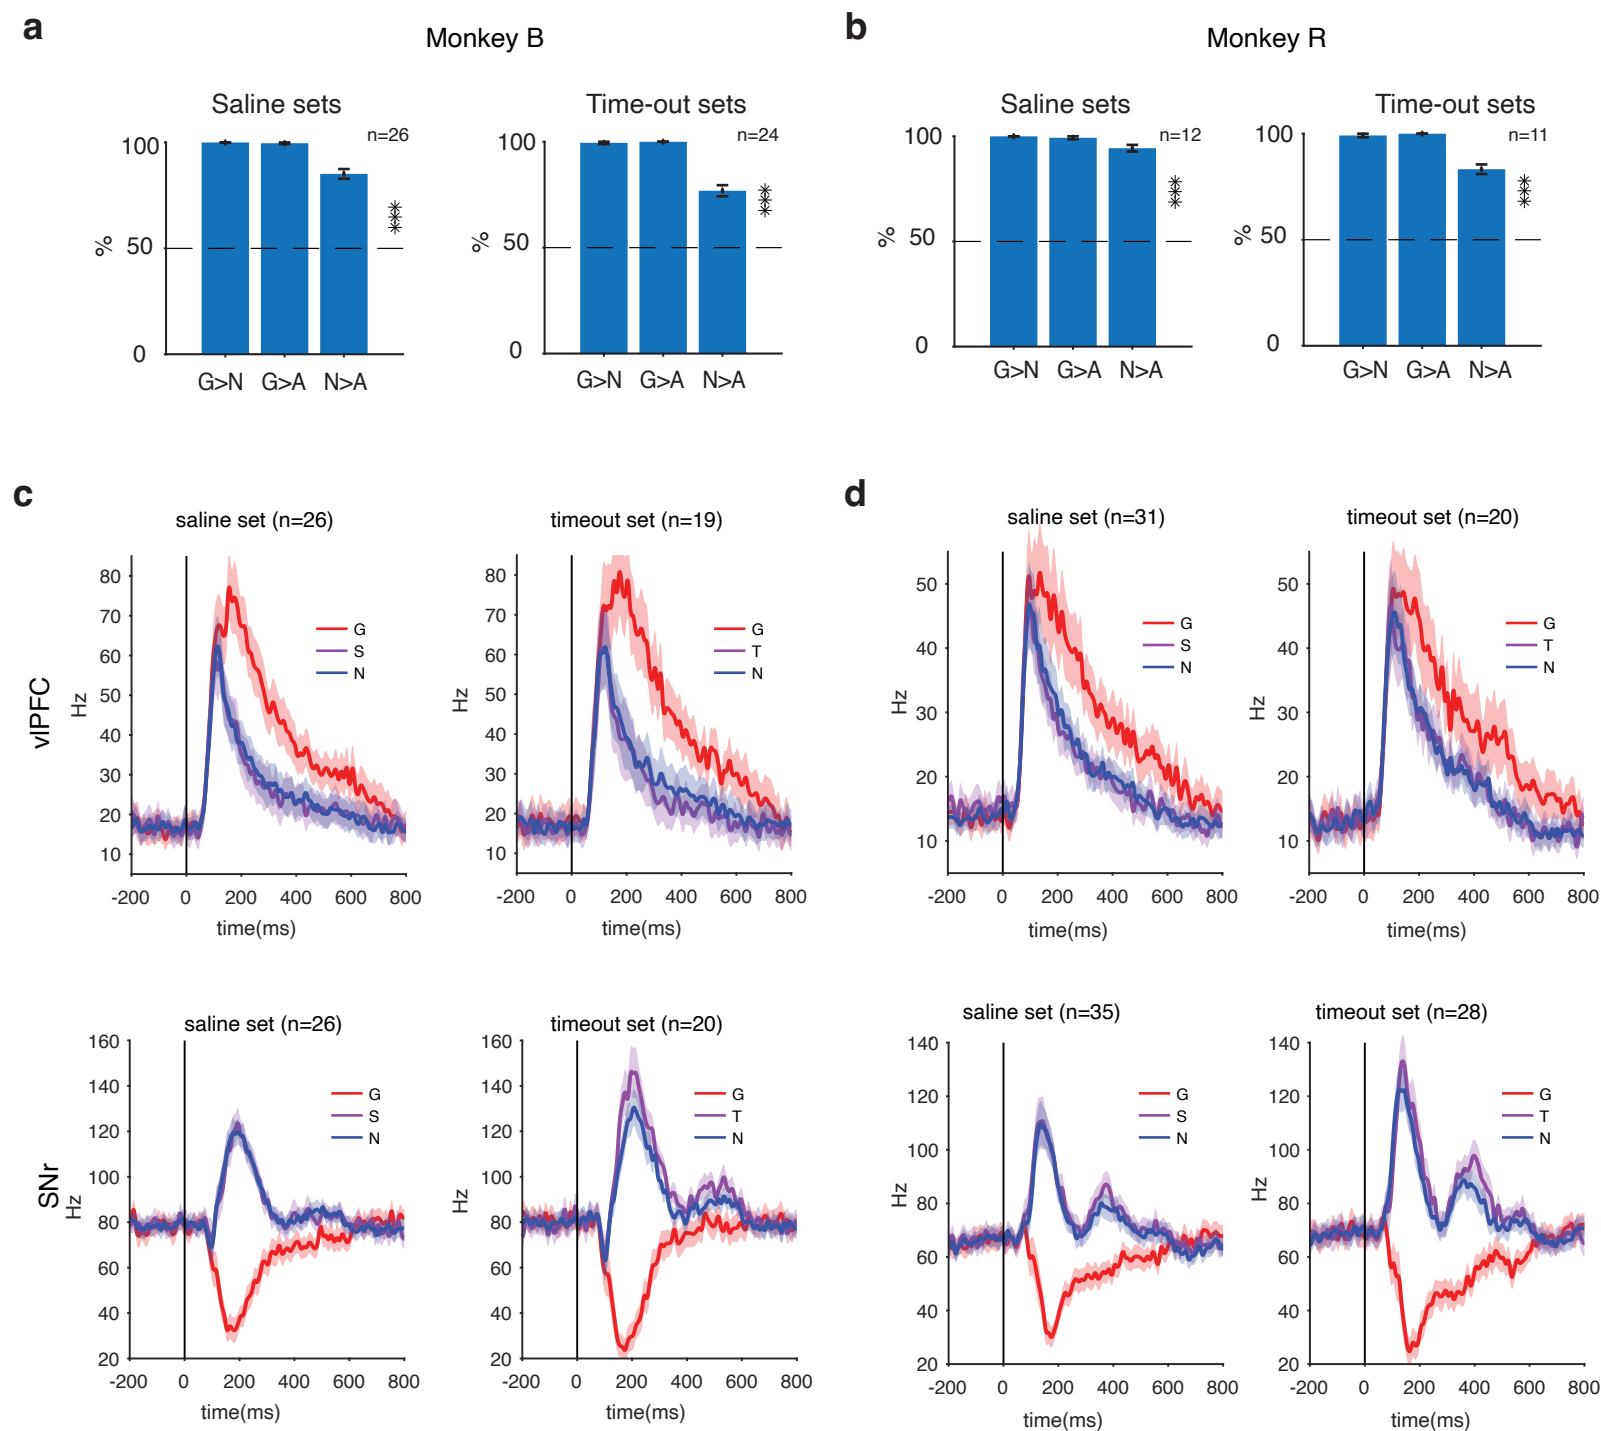

### Supplementary Figure 5. Choice performance and neuronal responses of vIPFC and cdISNr to saline and time-out sets separately for each monkey.

a-b) Same format as Figure 4B. (Monkey B: saline, N>A  $t_{11}=28$ ,  $p=1e-11$ ; time-out, N>A  $t_{10}=14$ ,  $p=4e-8$ . Monkey R: saline, N>A  $t_{15}=25$ ,  $p=2e-14$ ; time-out, N>A  $t_{23}=10$ ,  $p=7e-10$ .) C-D) Same format as Figure 4D. Data in A and B are presented as mean values  $\pm$  SEM. Source data are provided as a Source Data file.

## Supplementary Figure 6

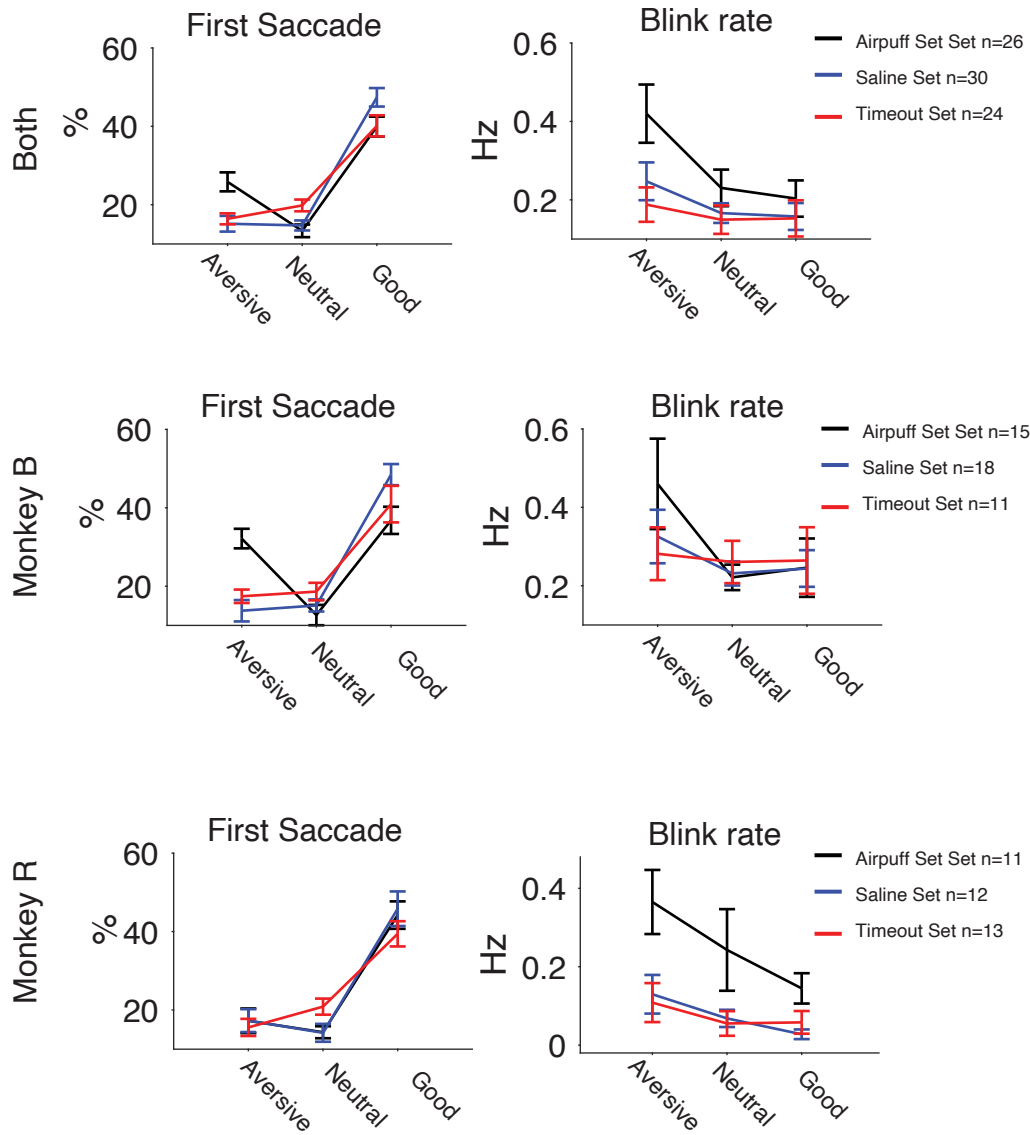

### Supplementary Figure 6. First saccade and blink rates during free viewing for airpuff, salience and time-out sets for both monkeys and separately for each monkey.

Free viewing gaze bias using first saccade following display onset toward aversive, neutral and good objects and the blinking rate during fixating the object in free viewing for airpuff, saline and time-out sets. The number of sessions in each set type is noted in the figure. Data are presented as mean values  $\pm$  SEM. Detailed stats are shown in Supplementary Table 1.

# Supplementary Figure 7

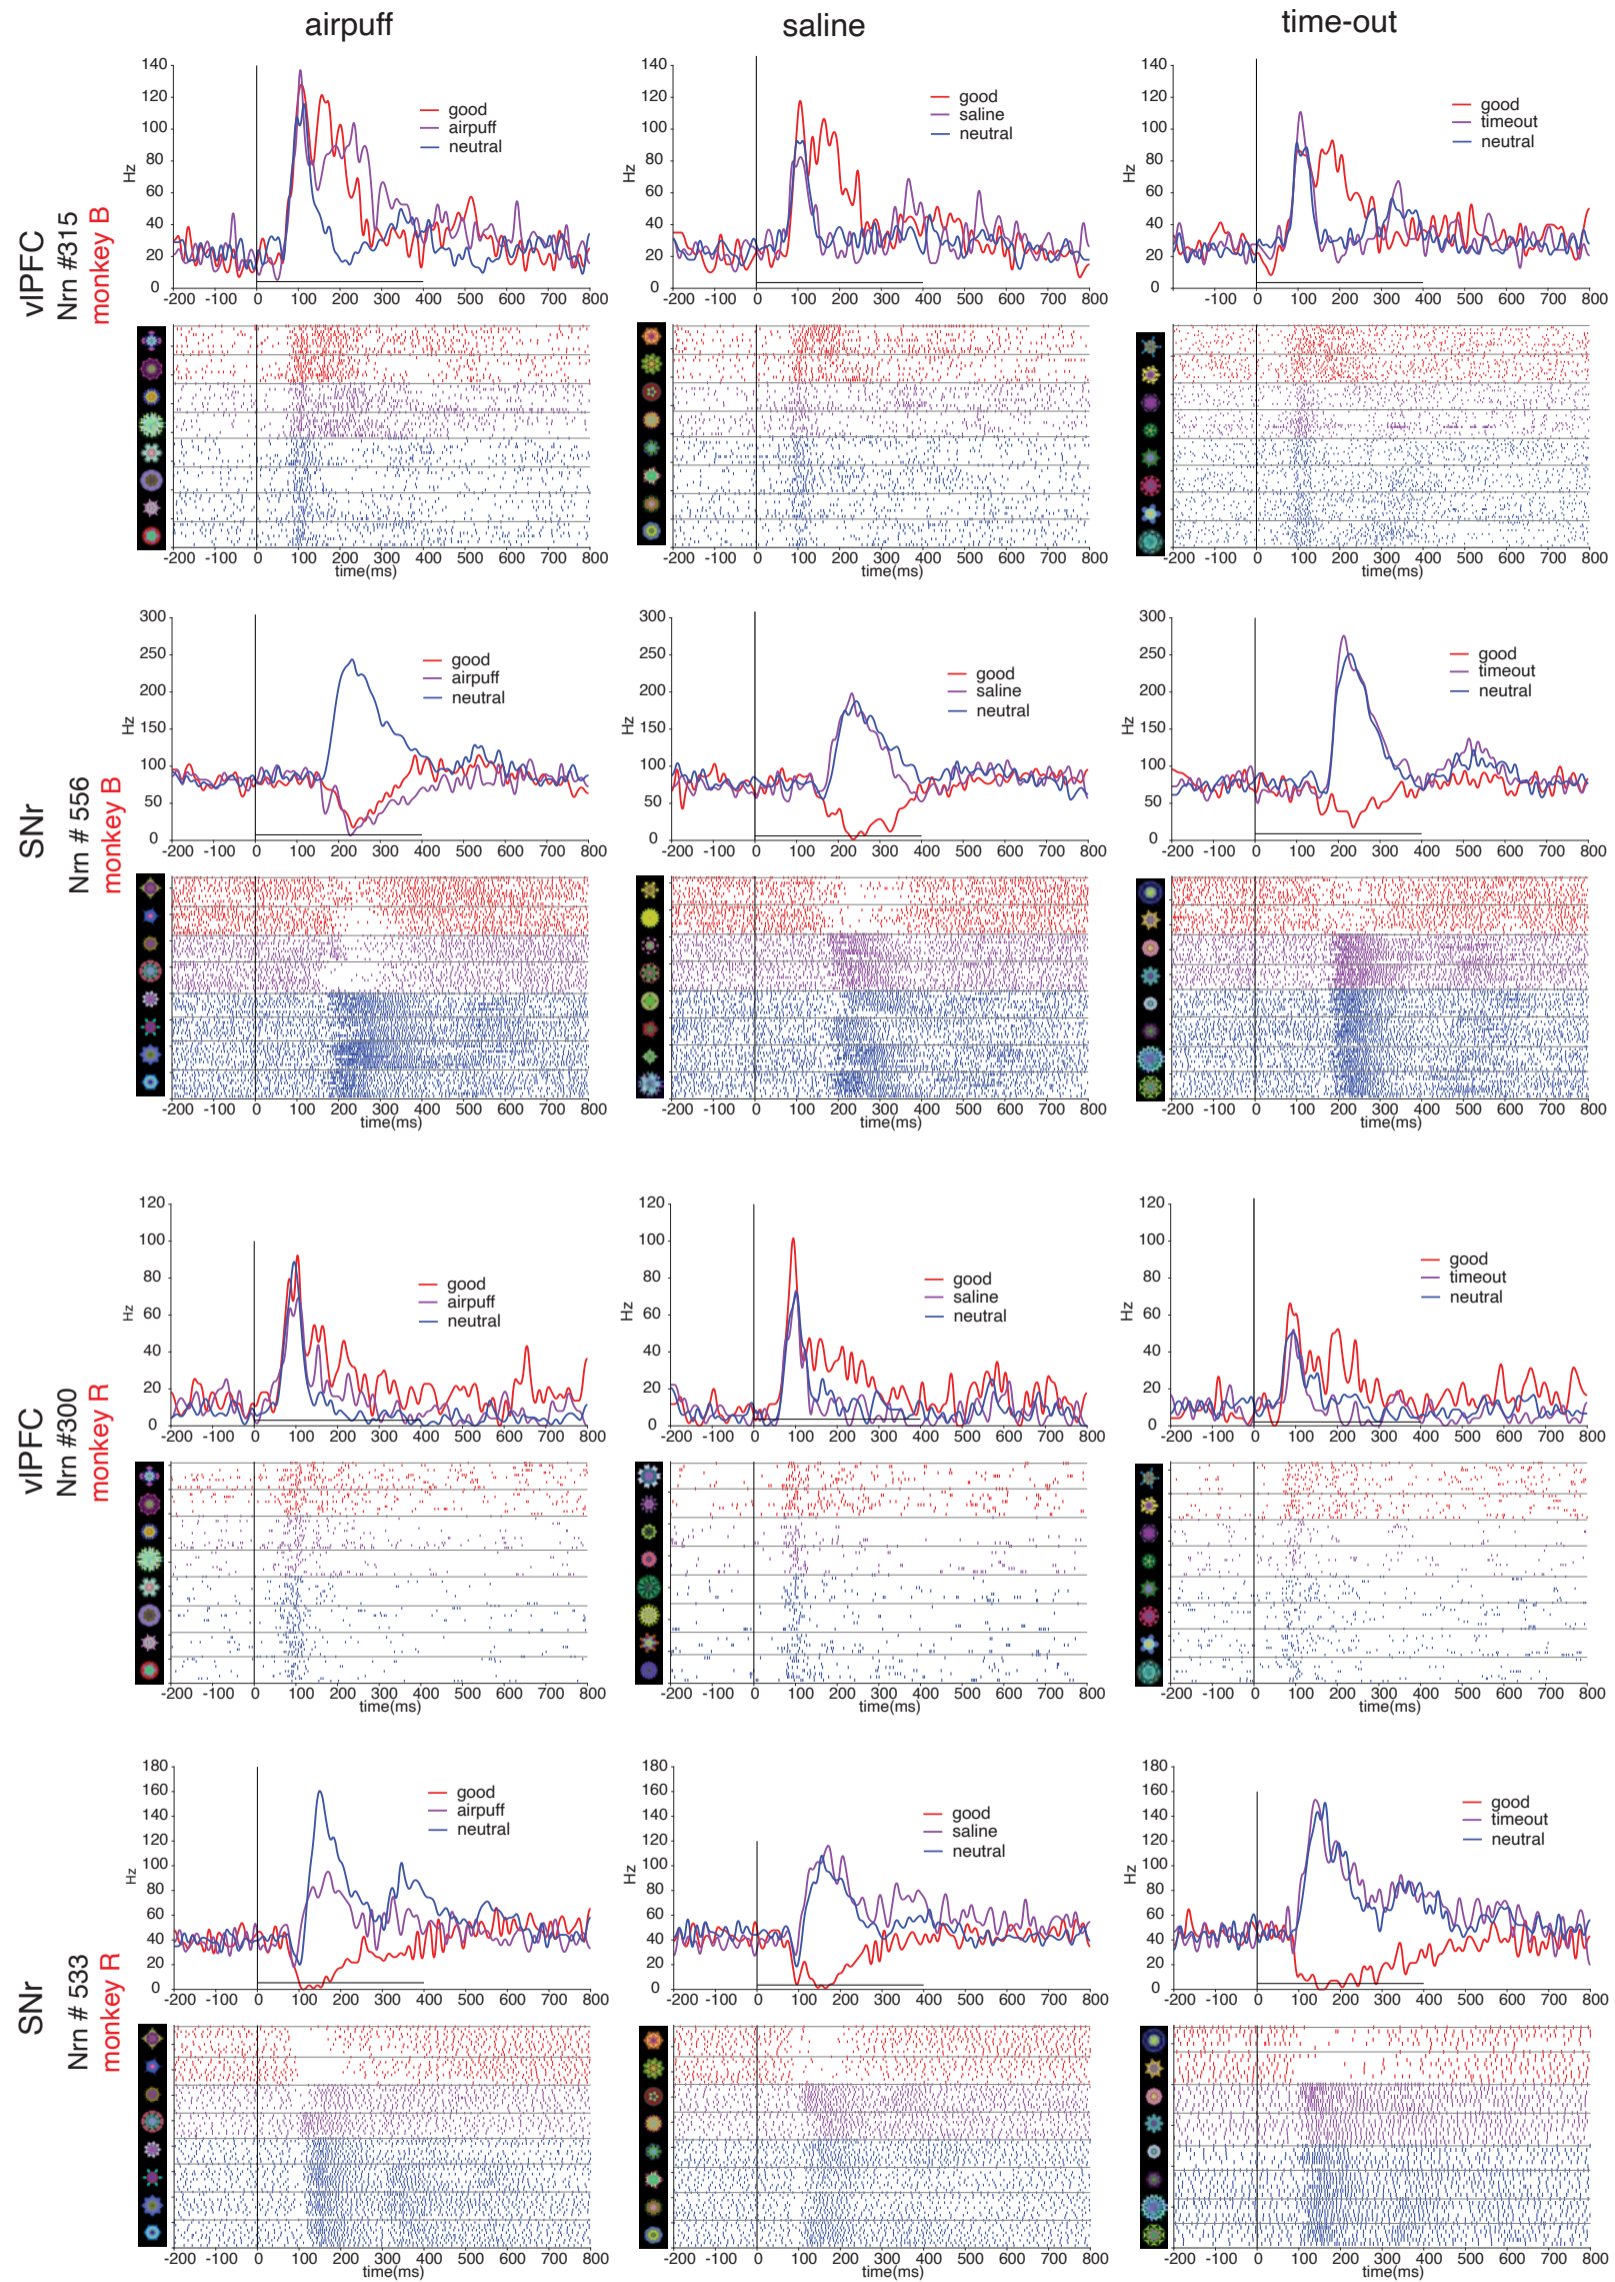

**Supplementary Figure 7. Example passive viewing responses to objects to airpuff, saline and time-out sets in VIPFC and cdISNr.**

Example neurons recorded with all three aversive set types in VIPFC and cdISNr in each monkey. Same format as Supplementary Figure 1.



## Supplementary Figure 8

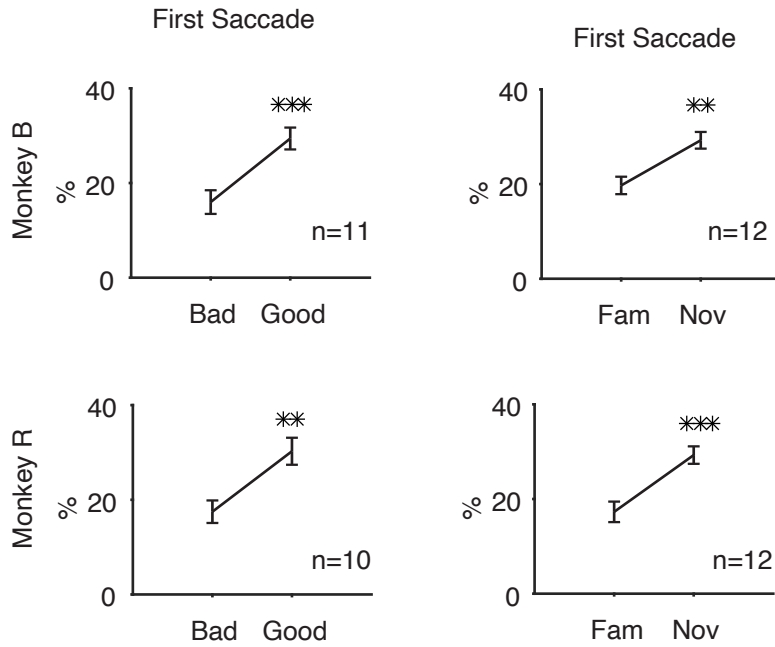

### Supplementary Figure 8. First saccade during free viewing for good/bad and novel/familiar separately for each monkey.

Free viewing gaze bias using first saccade following display onset toward good vs bad (Monkey B,  $t_{20}=3.9$   $p=8e-4$ , Monkey R,  $t_{18}=3.4$   $p=2e-3$ ) and novel vs familiar objects (Monkey B,  $t_{22}=3.7$   $p=1e-3$ , Monkey R,  $t_{22}=4$   $p=3e-4$ ). Source data are provided as a Source Data file.

## Supplementary Figure 9

**a**

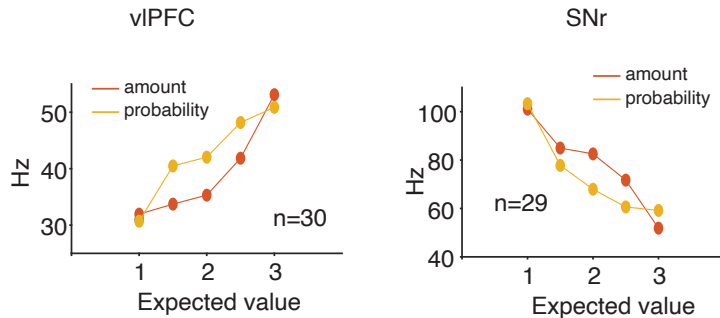

**b**

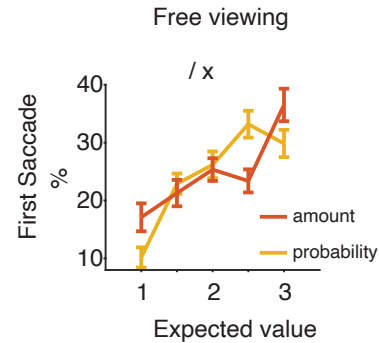

**c**

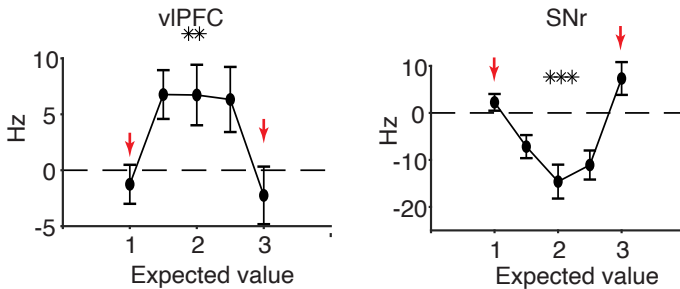

**d**

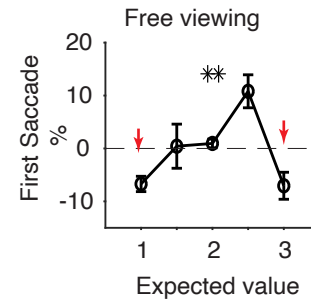

### Supplementary Figure 9. Graded response of vIPFC and cdISNr to objects with graded increase in reward amount and probability and corresponding graded change in object salience in free viewing

a) Average firing of neurons to objects from amount, probability sets as a function of expected value in vIPFC (top) and cdISNr (bottom). b) First saccade bias for objects in probability and amount sets as a function of their expected value (first saccade  $F_{4,395} > 4.8$   $p < 8e-4$  main effect of value and interaction). Total of 38 amount and 43 probability sessions, / and X indicate main effect of value and interaction, respectively. c) Average firing difference for objects with the same expected value from probability sets compared to amount sets in vIPFC (top,  $F_{4,145} = 3.5$ ,  $p = 9e-3$ ) and cdISNr (bottom,  $F_{4,140} = 9.6$ ,  $p = 6e-7$ ). d) Difference in gaze bias for probability sets compared to amount sets (first saccade  $F_{4,15} = 7.2$   $p = 1e-3$ ). The red arrows annotate the difference in response at lowest and highest values to amount and probability objects despite matching value and lack of uncertainty. This effect can also be seen if attentional bias to amount and value are subtracted in free viewing but has no easy interpretation in predictions made within value or risk frameworks. Data in B, C and D are presented as mean values  $\pm$  SEM. [adapted and reproduced from Ghazizadeh & Hikosaka 2021 with permission from Science Advances]

# Supplementary Figure 10

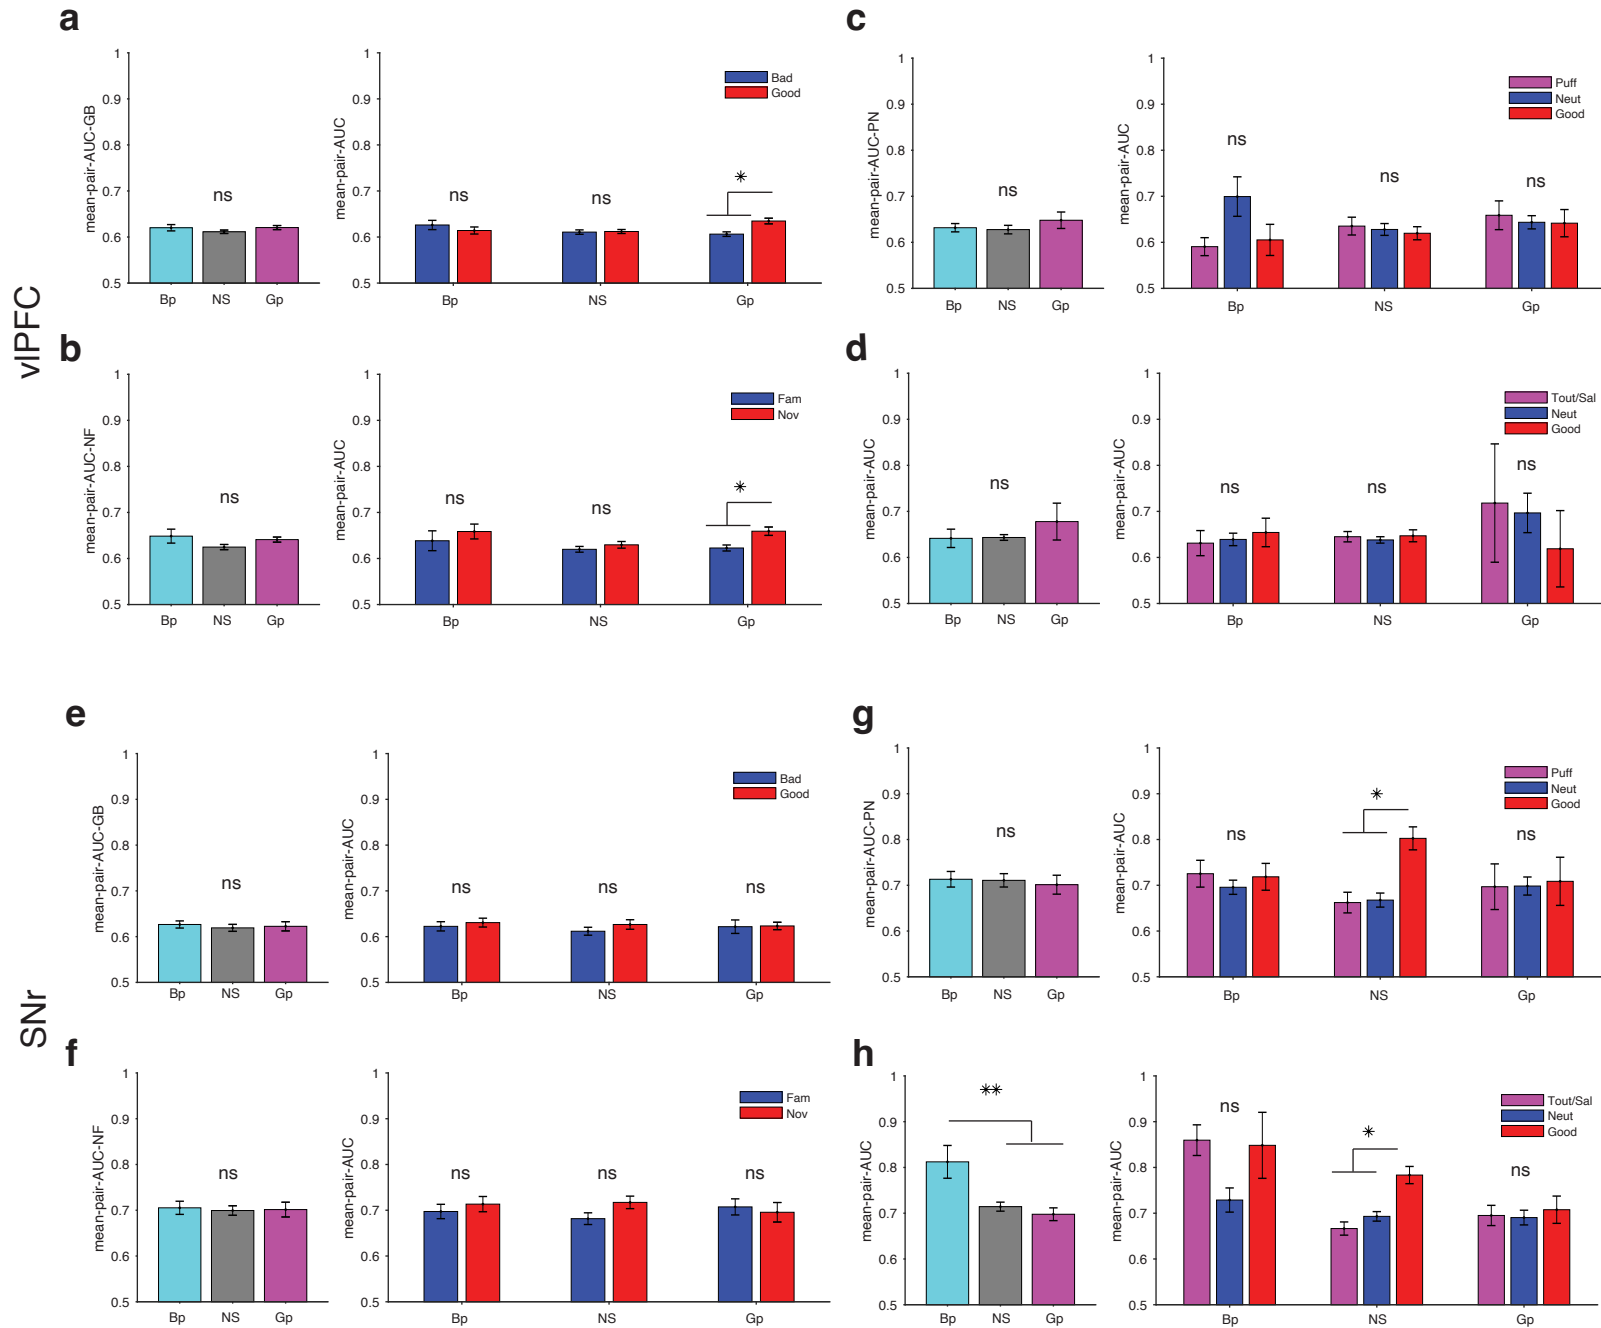

## Supplementary Figure 10. Within category object discrimination using pairwise AUC among objects in vIPFC and cdISNr separately for Gp, NS and Bp neurons.

a) vIPFC object discrimination for good/bad objects across neuron types (left;  $F_{2,346}=1.4$   $p=0.2$ ) and separately for good and bad objects across neuron types (right;  $F_{1,692}=1.1$ ,  $p=0.2$ , interaction  $F_{2,692}=5.3$ ,  $p=4e-3$ ). b) vIPFC object discrimination for novel/familiar objects across neuron types (left;  $F_{2,189}=2.6$   $p=0.07$ ) and separately for novel and familiar objects across neuron types (right;  $F_{1,378}=5.4$ ,  $p=0.02$ , interaction  $F_{2,378}=1.6$ ,  $p=0.1$ ). c) vIPFC object discrimination for airpuff/neutral /good objects across neuron types (left;  $F_{2,56}=0.6$   $p=0.5$ ) and separately for airpuff, neutral and good objects across neuron types (right;  $F_{2,168}=1.2$ ,  $p=0.27$ , interaction  $F_{4,168}=1$ ,  $p=0.3$ ). d) vIPFC object discrimination for saline or time-out/neutral /good objects across neuron types (left;  $F_{2,93}=0.5$   $p=0.5$ ) and separately for saline/timeout, neutral and good objects across neuron types (right;  $F_{2,279}=0.3$ ,  $p=0.6$ , interaction  $F_{4,279}=0.5$ ,  $p=0.6$ ). e) cdISNr object discrimination for good/bad objects across neuron types (left;  $F_{2,113}=0.2$   $p=0.7$ ) and separately for good and bad objects across neuron types (right;  $F_{1,226}=0.5$ ,  $p=0.4$ , interaction  $F_{2,226}=0.1$ ,  $p=0.8$ ). f) cdISNr object discrimination for novel/familiar objects across neuron types (left;  $F_{2,80}=0.06$   $p=0.9$ ) and separately for novel and familiar objects across neuron types (right;  $F_{1,160}=0.9$ ,  $p=0.3$ , interaction  $F_{2,160}=0.9$ ,  $p=0.4$ ). g) cdISNr object discrimination for airpuff/neutral /good objects across neuron types (left;  $F_{2,160}=0.05$   $p=0.9$ ) and separately for airpuff, neutral and good objects across neuron types (right;  $F_{2,186}=2.5$ ,  $p=0.08$ , interaction  $F_{4,186}=3$ ,  $p=0.01$ ). h) cdISNr object discrimination for saline/time-out/neutral /good objects across neuron types (left;  $F_{2,106}=5.5$   $p=5e-3$ ) and separately for saline/timeout, neutral and good objects across neuron types (right;  $F_{2,318}=4.1$ ,  $p=0.01$ , interaction  $F_{4,318}=3$ ,  $p=0.01$ ). Given similar results for saline and time-out objects, results are combined for the two set types. Data in a-h are presented as mean values +/- SEM.

# Supplementary Figure 11

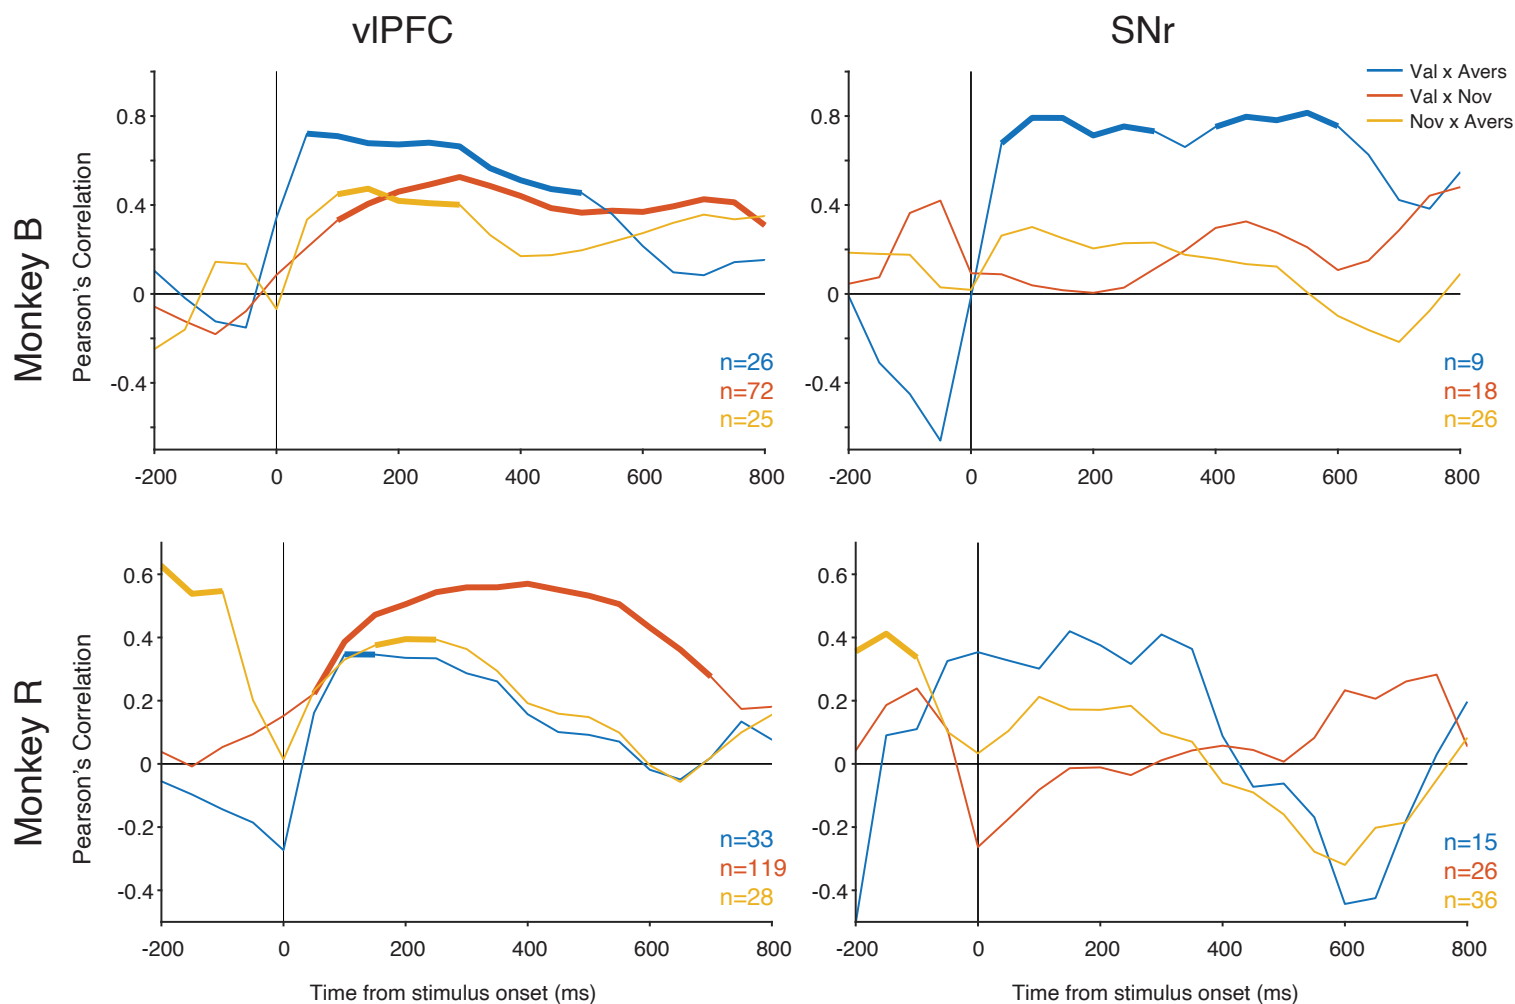

**Supplementary Figure 11. Sliding pairwise correlation across value, novelty and aversive (airpuff) dimension for vIPFC and cdISNr.**

Same format as Figure 6 but separately for each monkey.

## Supplementary Figure 12

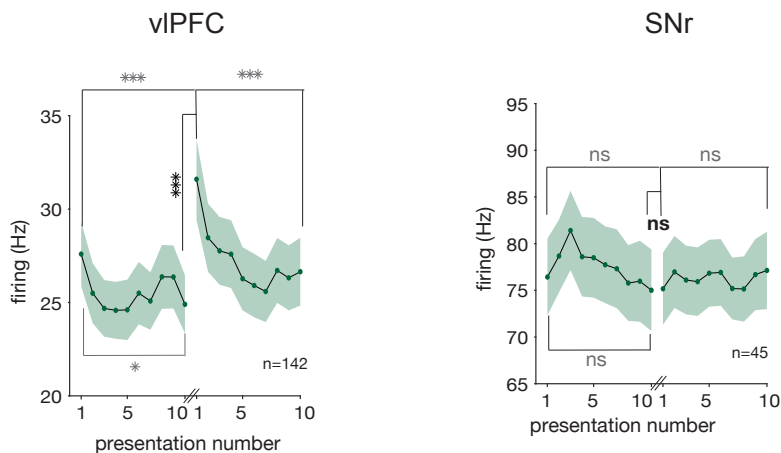

### Supplementary Figure 12. Sensitivity of vIPFC but not cdISNr to object recency.

Population average firing in two consequent blocks of passive viewing done with two different object sets showing recovery of response suppression in vIPFC (top,  $F_{9,2547}=10$   $p=2e-9$  main effect of trial, last trial of first block vs first trial of second block  $t_{141}=4.9$   $p=2e-6$ , first vs last trial of first first block  $t_{141}=2.3$   $p=0.01$ , first vs last trial of second block  $t_{141}=4.4$   $p=2e-5$ , first trial of first vs second block  $t_{141}=3.6$   $p=3e-4$ ) but not in cdISNr (bottom,  $F_{9,801}=1.3$   $p=0.18$  main effect of trial, last trial of first block vs first trial of second block  $t_{44}=0.44$   $p=0.9$ , other pairwise tests shown  $abs(t_{141})<0.9$   $p>0.4$ ). Data are presented as mean values +/- SEM. [reproduced with permission from Science Advances]

## Supplementary Figure 13

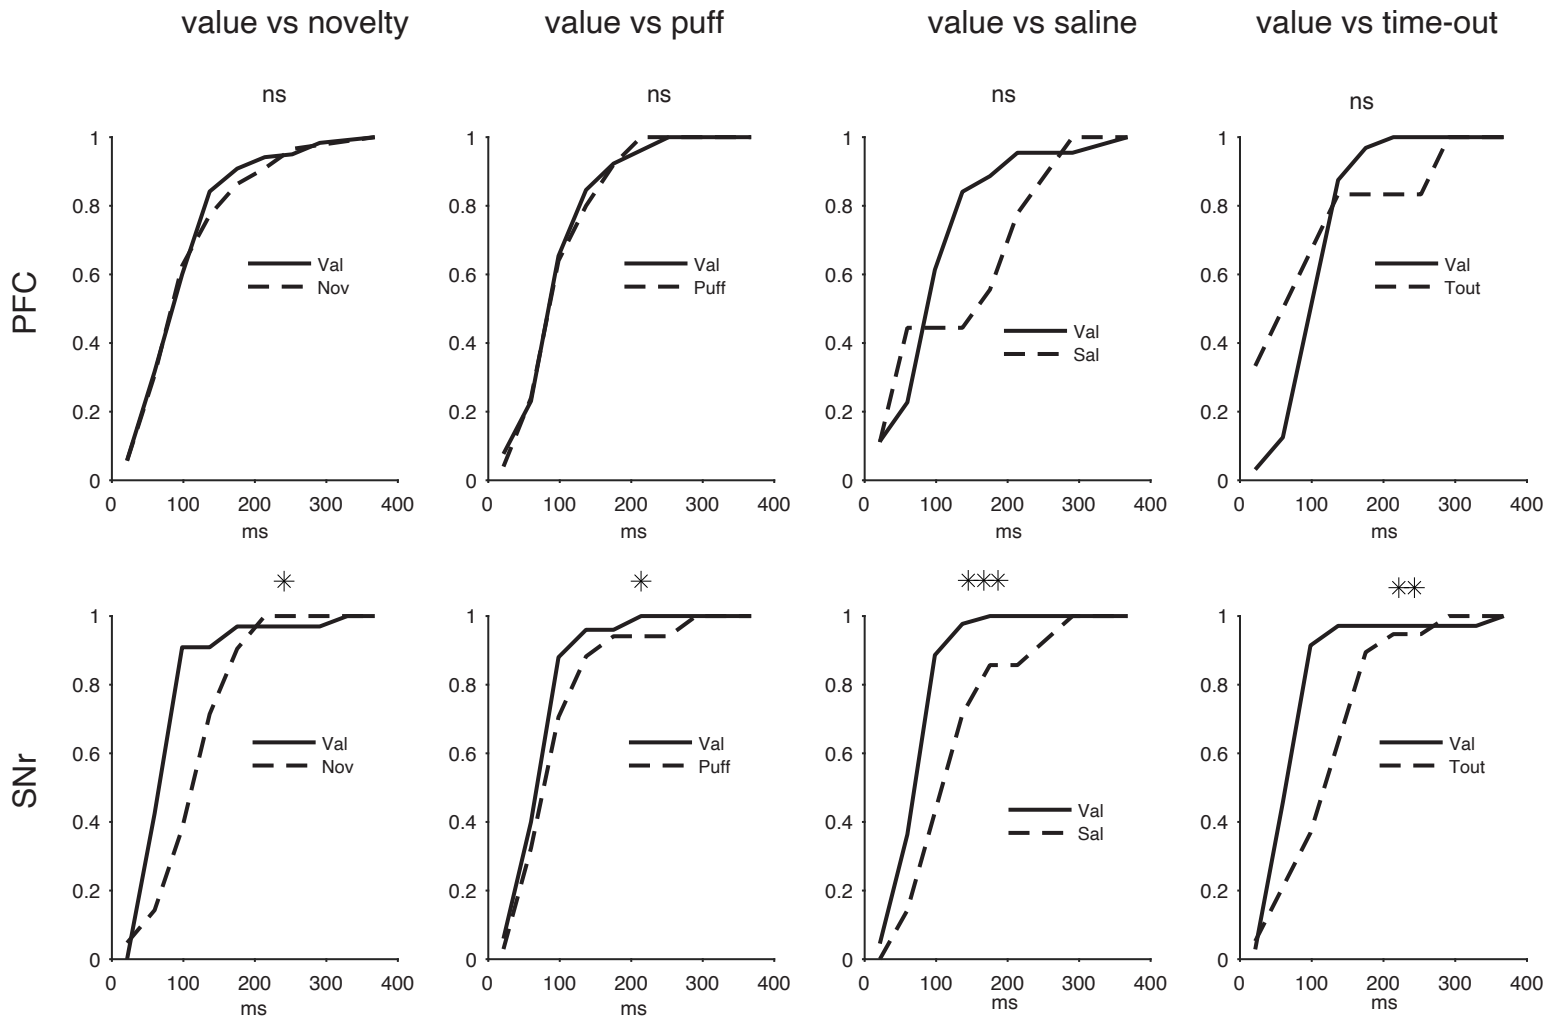

### Supplementary Figure 13. Cumulative onset distributions comparison for value vs novelty, value vs airpuff, value vs saline and value vs time-out signals within vIPFC and cdISNr neurons.

Novelty vs value signal onsets from neurons that have both GB and NF sets in vIPFC (average 119 vs 113  $t_{206}=-0.5$ ,  $p=0.5$ ) in cdISNr (average 128 vs 94 ms,  $t_{52}=-2.3$ ,  $p=0.02$ ). Airpuff vs value signal onsets from neurons recorded with airpuff sets (value signal comes from good minus neutral and airpuff signal comes from airpuff minus neutral) in vIPFC (average 116 vs 110,  $t_{75}=-0.5$ ,  $p=0.6$ ) and in cdISNr (average 107 vs 86ms,  $t_{82}=-2$ ,  $p=0.04$ ). Saline vs value signal onsets from neurons recorded with saline sets (value signal comes from good minus neutral and saline signal comes from saline minus neutral) in vIPFC (average 146 vs 116ms  $t_{51}=-1.1$ ,  $p=0.2$ ) and in cdISNr (average 132 vs 88ms,  $t_{56}=-3.5$ ,  $p=7e-4$ ). Timeout vs value signal onsets from neurons recorded with time-out sets (value signal comes from good minus neutral and time-out signal comes from time-out minus neutral) in vIPFC (average 100 vs 114ms  $t_{36}=0.6$ ,  $p=0.5$ ) and in cdISNr (average 135 vs 91ms,  $t_{52}=-2.7$ ,  $p=8e-3$ ).

## Supplementary Figure 14

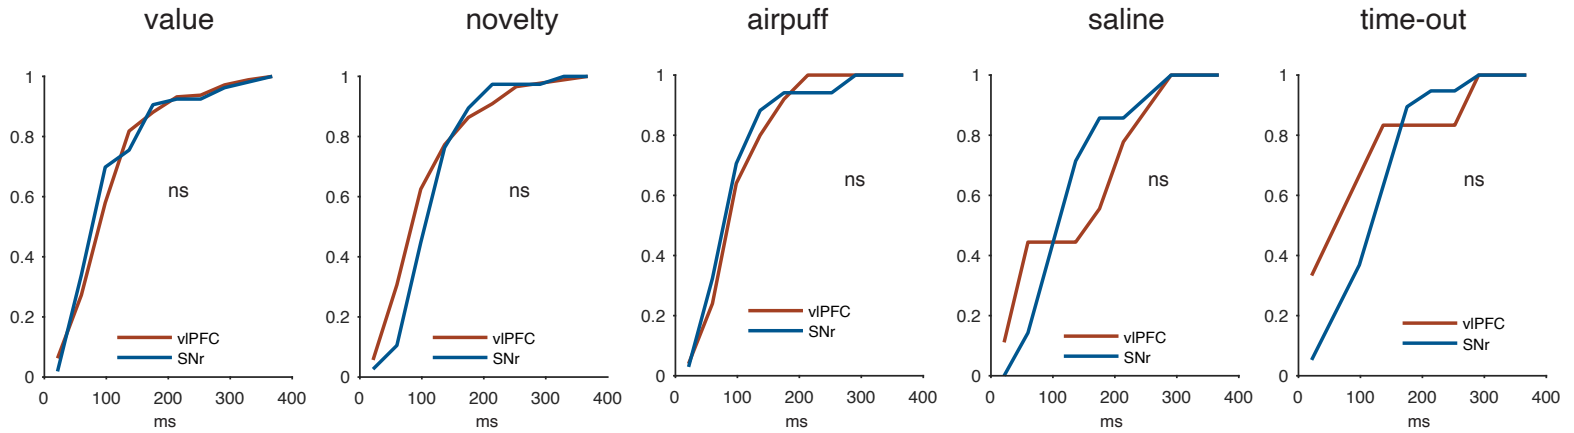

### Supplementary Figure 14. Cumulative onset distributions comparison for value, novelty, airpuff, saline and time-out signals between vIPFC and cdISNr neurons.

Value signal onsets between neurons recorded with GB sets in vIPFC and cdISNr (average 120 vs 117 ms,  $t_{227}=0.2$ ,  $p=0.8$ ). Novelty signal onsets between neurons recorded with NF sets in vIPFC and cdISNr (average 119 vs 131 ms,  $t_{124}=-0.9$ ,  $p=0.3$ ). Airpuff signal onsets between neurons recorded with airpuff sets in vIPFC and cdISNr (average 116 vs 107 ms,  $t_{57}=0.6$ ,  $p=0.4$ ). Saline signal onsets between neurons recorded with saline sets in vIPFC and cdISNr (average 146 vs 132 ms,  $t_{21}=0.4$ ,  $p=0.6$ ). Time-out signal onsets between neurons recorded with time-out sets in vIPFC and cdISNr (average 100 vs 135 ms,  $t_{23}=-1$ ,  $p=0.2$ ).

**Supplementary Table 1.** Detailed stats for data shown in Supplementary Fig 6.

|       | Aversive set | Measure                  | ANOVA F    | ANOVA P  | A vs N | A vs G | N vs G |
|-------|--------------|--------------------------|------------|----------|--------|--------|--------|
| Both  | airpuff      | First saccade percentage | F2,74=35   | 1E-11    | 0.0005 | 0.0001 | <1e-4  |
|       |              | Blinking rate            | F2,74=4.2  | 0.018    | 0.057  | 0.025  | 0.94   |
|       | saline       | First saccade percentage | F2,86=92   | 3E-22    | 0.97   | <1e-4  | <1e-4  |
|       |              | Blinking rate            | F2,86=2.2  | 0.11     | 0.19   | 0.13   | 0.98   |
|       | Timeout      | First saccade percentage | F2,68=42   | 1E-12    | 0.44   | <1e-4  | <1e-4  |
|       |              | Blinking rate            | F2,68=0.32 | 0.72     | 0.75   | 0.78   | 0.99   |
| Bongo | airpuff      | First saccade percentage | F2,42=19.7 | 9.00E-07 | 0.0001 | 0.5    | <1e-4  |
|       |              | Blinking rate            | F2,42=2.5  | 8.00E-02 | 0.1    | 0.16   | 0.9    |
|       | saline       | First saccade percentage | F2,51=67   | 4.00E-15 | 0.9    | <1e-4  | <1e-4  |
|       |              | Blinking rate            | F2,51=1    | 3.70E-01 | 0.4    | 0.5    | 0.98   |
|       | Timeout      | First saccade percentage | F2,30=1    | 8.00E-06 | 0.9    | <1e-4  | 0.0001 |
|       |              | Blinking rate            | F2,30=0.02 | 9.70E-01 | 0.97   | 0.98   | 0.99   |
| Reno  | airpuff      | First saccade percentage | F2,30=33   | 2.00E-08 | 0.75   | <1e-4  | <1e-4  |
|       |              | Blinking rate            | F2,30=1.9  | 1.60E-01 | 0.52   | 0.14   | 0.66   |
|       | saline       | First saccade percentage | F2,33=27   | 9.00E-08 | 0.78   | <1e-4  | <1e-4  |
|       |              | Blinking rate            | F2,33=2.5  | 9.00E-02 | 0.37   | 0.07   | 0.64   |
|       | Timeout      | First saccade percentage | F2,36=24   | 2.00E-07 | 0.31   | <1e-4  | <1e-4  |
|       |              | Blinking rate            | F2,36=0.6  | 5.00E-01 | 0.58   | 0.61   | 0.99   |
